# Supplementary material
Source: Springer Nature journal article supplement (https://www.springermedizin.de/resource/supplementary/12958_2003_112_MOESM2_ESM.pdf/9566146)
Supplement: MOESM2 [file 9566146]

tagtgccacccacacggagaaattcagagccatataaaacgggtctccagggcctggaggg 60 TATA box

**M G G L L L**  
**MetGlyGlyLeuLeuLeu**

acTGCACATCCTGGGCGCTGCGGCGCAGTGTAGACCTGGGAGGATGGGCGGCCTGCTGCTG 120  
^

**A A F L A L V S V P R A Q A V W L G R L**  
**AlaAlaPheLeuAlaLeuValSerValProArgAlaGlnAla**ValTrpLeuGlyArgLeu (6)  
GCTGCTTTTCTGGCTTTGGTCTCGGTGCCAGGGCCCAGGCCGTGTGGTTGGGAAGACTG 180

EXON 1

D P E Q  
AspProGluGln (10)  
GACCTGAGCAGgtacagtcctcctctgggggtggggagagctgggcctcctggggggccagccc 240  
//  
ttggaggctggaggctggaggctggaggctggaggctggggcctaacggggagccgcctcaatgc 1020

L L **G P W Y** V L A V A S R E K G F A M E  
LeuLeu**GlyProTrpTyr**ValLeuAlaValAlaSerArgGluLysGlyPheAlaMetG (30)  
agCTTCTTGGGCCCTGGTACGTGCTTGCAGTGGCCCTCCCGGGAAAAGGGCTTTGCCATGG 1080

EXON 2

K D M K N V V G V V V T L T P E N N L R  
luLysAspMetLysAsnValValGlyValValValThrLeuThrProGluAsnAsnLeuA (50)  
AGAAGGACATGAAGAACGTCGTGGGGGTGGTGGTGACCCTCACTCCAGAAAACAACCTGC 1140

T L S S Q H G  
rgThrLeuSerSerGlnHisGl (57)  
GGACGCTGTCTCTCAGCACGGgtgagtgggcggtcctgccaggccttcccgcagggcag 1200  
//  
gctggcctggcctggactcctgagctccgtctcctctcaccgggccccgggggtcttgacc 2640

L G G C D Q S V M D  
yLeuGlyGlyCysAspGlnSerValMetA (67)  
ctgagtggggtgacaggcccccttcttttccagGCTGGGAGGGTGTGACCAGAGTGTTCATGG 2700

EXON 3

L I K R N S G W V F E N P S  
spLeuIleLysArgAsnSerGlyTrpValPheGluAsnProS (81)  
ACCTGATAAAGCGAAACTCCGGATGGGTGTTTGGAGAATCCCTgtgagctctgacggccacg 2760  
//  
gctcagcggccccctggatggatacagcagctgccctcccctgaggcgggggggttttgttt 3300

I G V L E L W V L A **T N F R D Y** A I  
erIleGlyValLeuGluLeuTrpValLeuAla**ThrAsnPhe**ArgAsp**Tyr**AlaIl (99)  
cctagCAATAGGCGTGTGAGCTCTGGGTGCTGGCCACCAACTTCAGAGACTATGCCAT 3360

EXON 4

I F T Q L E F G D E P F N T V E L Y S  
eIlePheThrGlnLeuGluPheGlyAspGluProPheAsnThrValGluLeuTyrSe (118)  
CATCTTCACTCAGCTGGAGTTCGGGGACGAGCCCTTCAACACCGTGGAGCTGTACAGgta 3420  
//  
ccccccccggccccctcccagctctcagaggttgcttccccctgcactgccctgggtgcc 3840

**L T E T A S Q E A M G L F T K W S R**  
**rLeu**ThrGluThrAlaSerGlnGluAlaMetGlyLeuPheThrLysTrpSerAr (136)  
cccaggTCTGACGGAGACAGCCAGCCAGGAGGCCATGGGGCTCTTACCAAGTGGAGCAG 3900

EXON 5

S L G F L S Q \*  
gSerLeuGlyPheLeuSerGlnEnd (143)  
GAGCCTGGGCTTCCTGTACAGTAGCAGGCCAGCTGCAGAAGGACCgtgagtgccacc 3960  
//

EXON 6

ccagtcttgctcccccttctagTCACTGTGCTCACAAGATCCTTCTGgtaagccgcat 4260  
cctgagcctcaccctgggctctcttgggggaaggggtgggggaggccaccctacgcaca 4320  
//

tcagTGAGTGCTGCGTCCCCAGTAGGGATGGCGCCACAGGGTCTGTGACCTCGGCCAG 4500  
EXON 7  
TGTCCACCCACCTCGCTCAGCGGCTCCCGGGGCCAGCACCAGCTCAGAAATAAAGCGATT 4560 polyA  
CCACAGCAaccaaggatgcttttactggggggccagccgggggaattgcggggaggatggc 4620
